# Supplementary material
Source: PubMed Central journal article supplement (PMC6606351)
Supplement: NIHMS1528383-supplement-1.pdf [file NIHMS1528383-supplement-1.pdf]

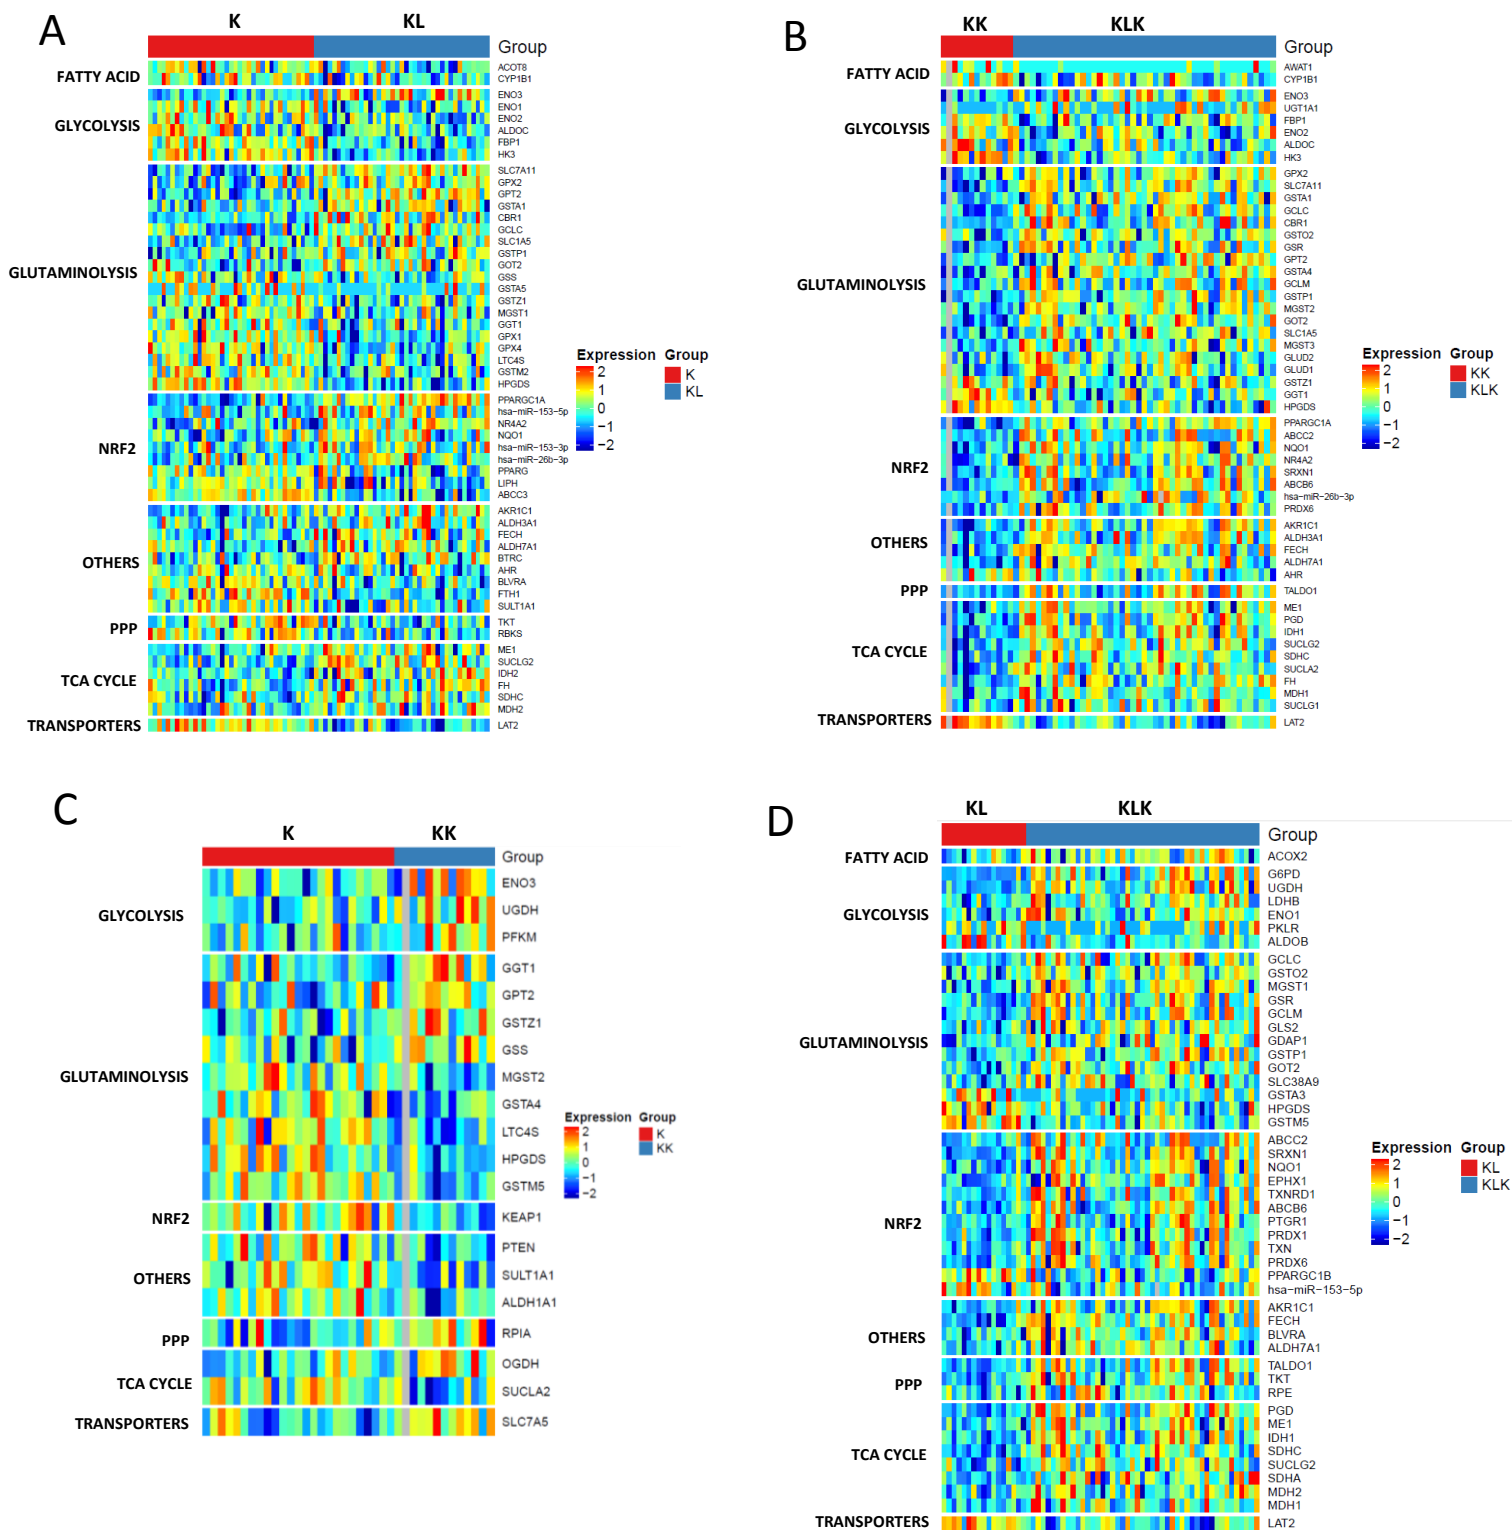

**Figure S1.** KRAS-mutant tumors with functional inactivation of LKB1 (KL tumors) and a KEAP1 co-mutation (KLK tumors) exhibit evidence of metabolic reprogramming and adaptation to oxidative and energetic stress. **(A)** Heatmap depicting mRNA expression levels of significantly associated genes selected for the indicated pathways in K subset compared with KL **(B)**, KK subset compared with KLK **(C)**, K subset compared with KK or **(D)** KK compared with KLK. GSEA shows enrichment of gene expression signatures in K subset compared with KL subset, **(D)** or KL subset compared with KLK subset.

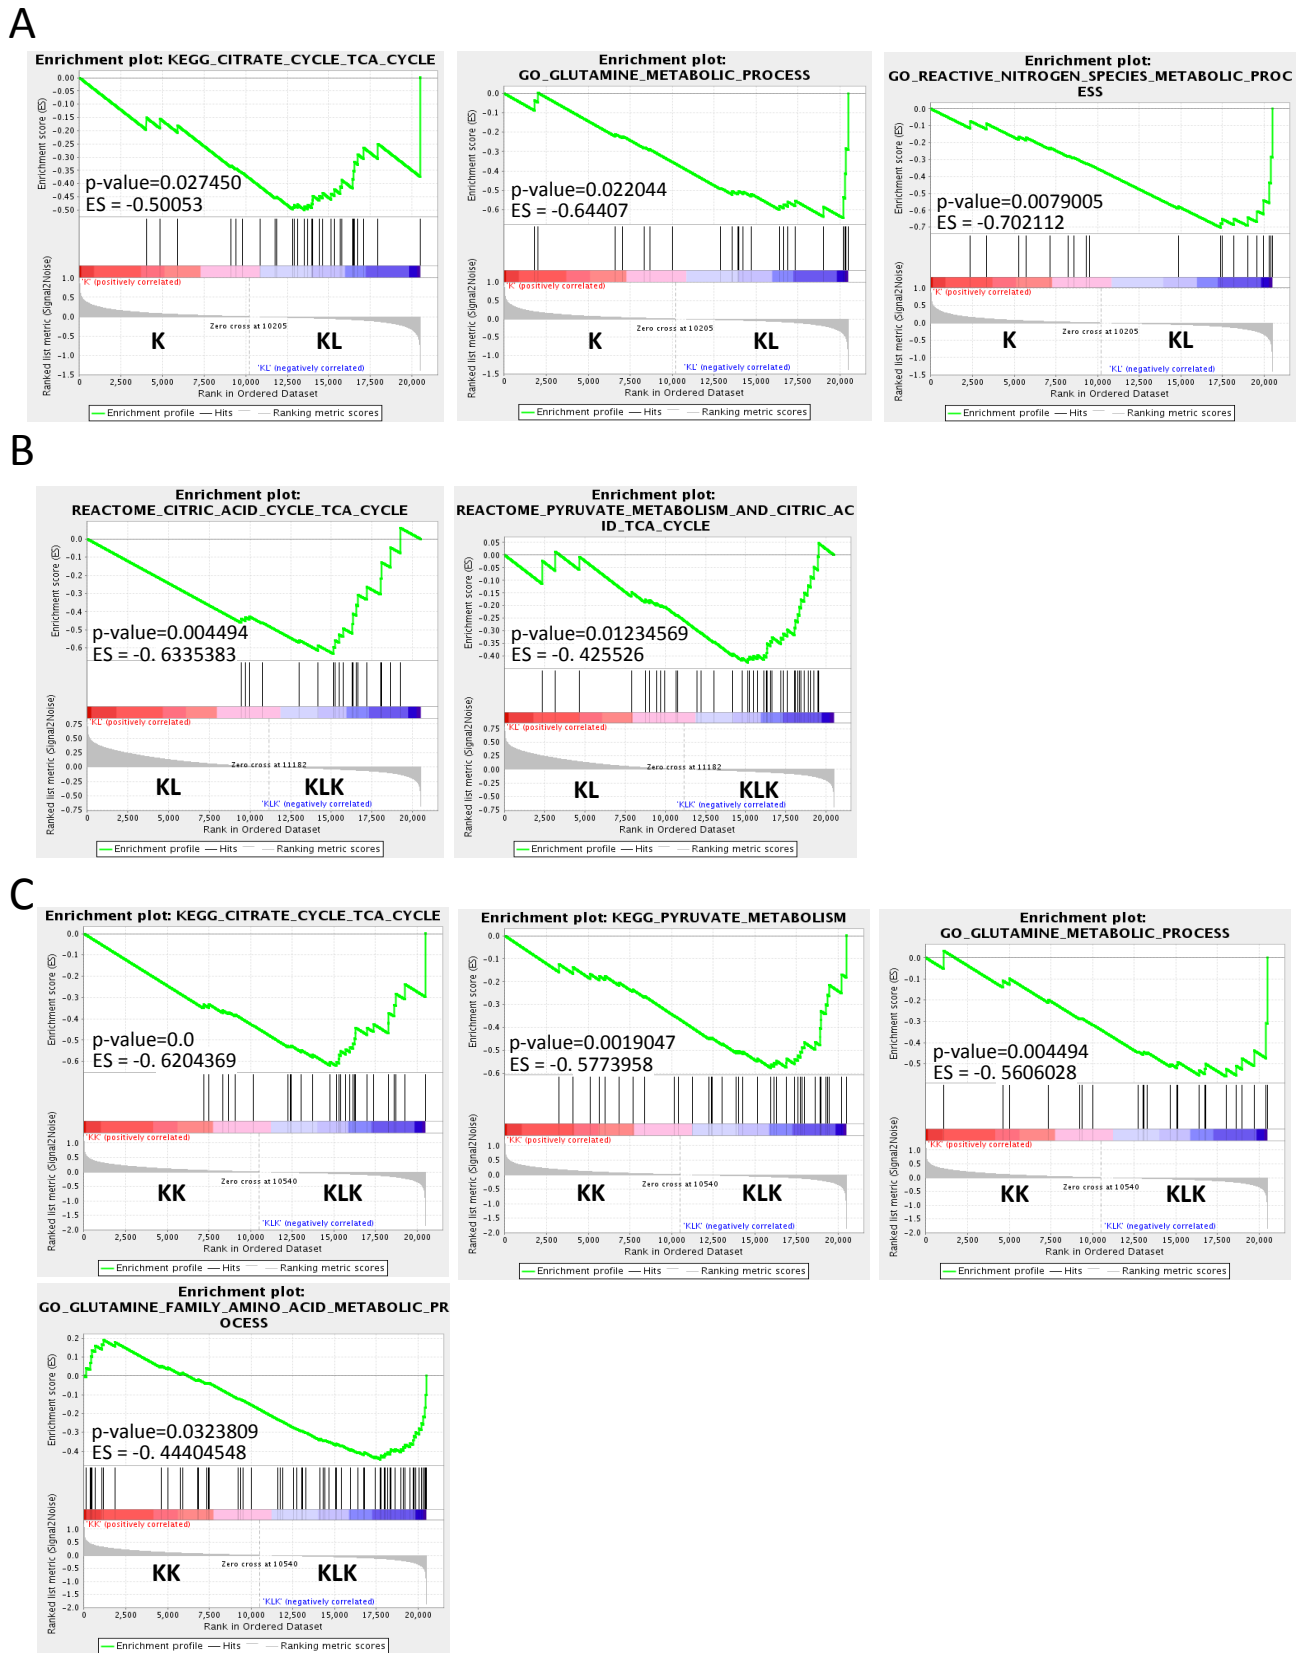

**Figure S2.** KRAS-mutant tumors with functional inactivation of LKB1 (KL tumors) and a KEAP1 co-mutation (KLK tumors) exhibit evidence of metabolic reprogramming and adaptation to oxidative and energetic stress. **(A)** GSEA shows enrichment of gene expression signatures in K subset compared with KL subset, **(B)** KL subset compared with KLK subset **(C)**, or KK subset compared with KLK subset. P-value < 0.05.

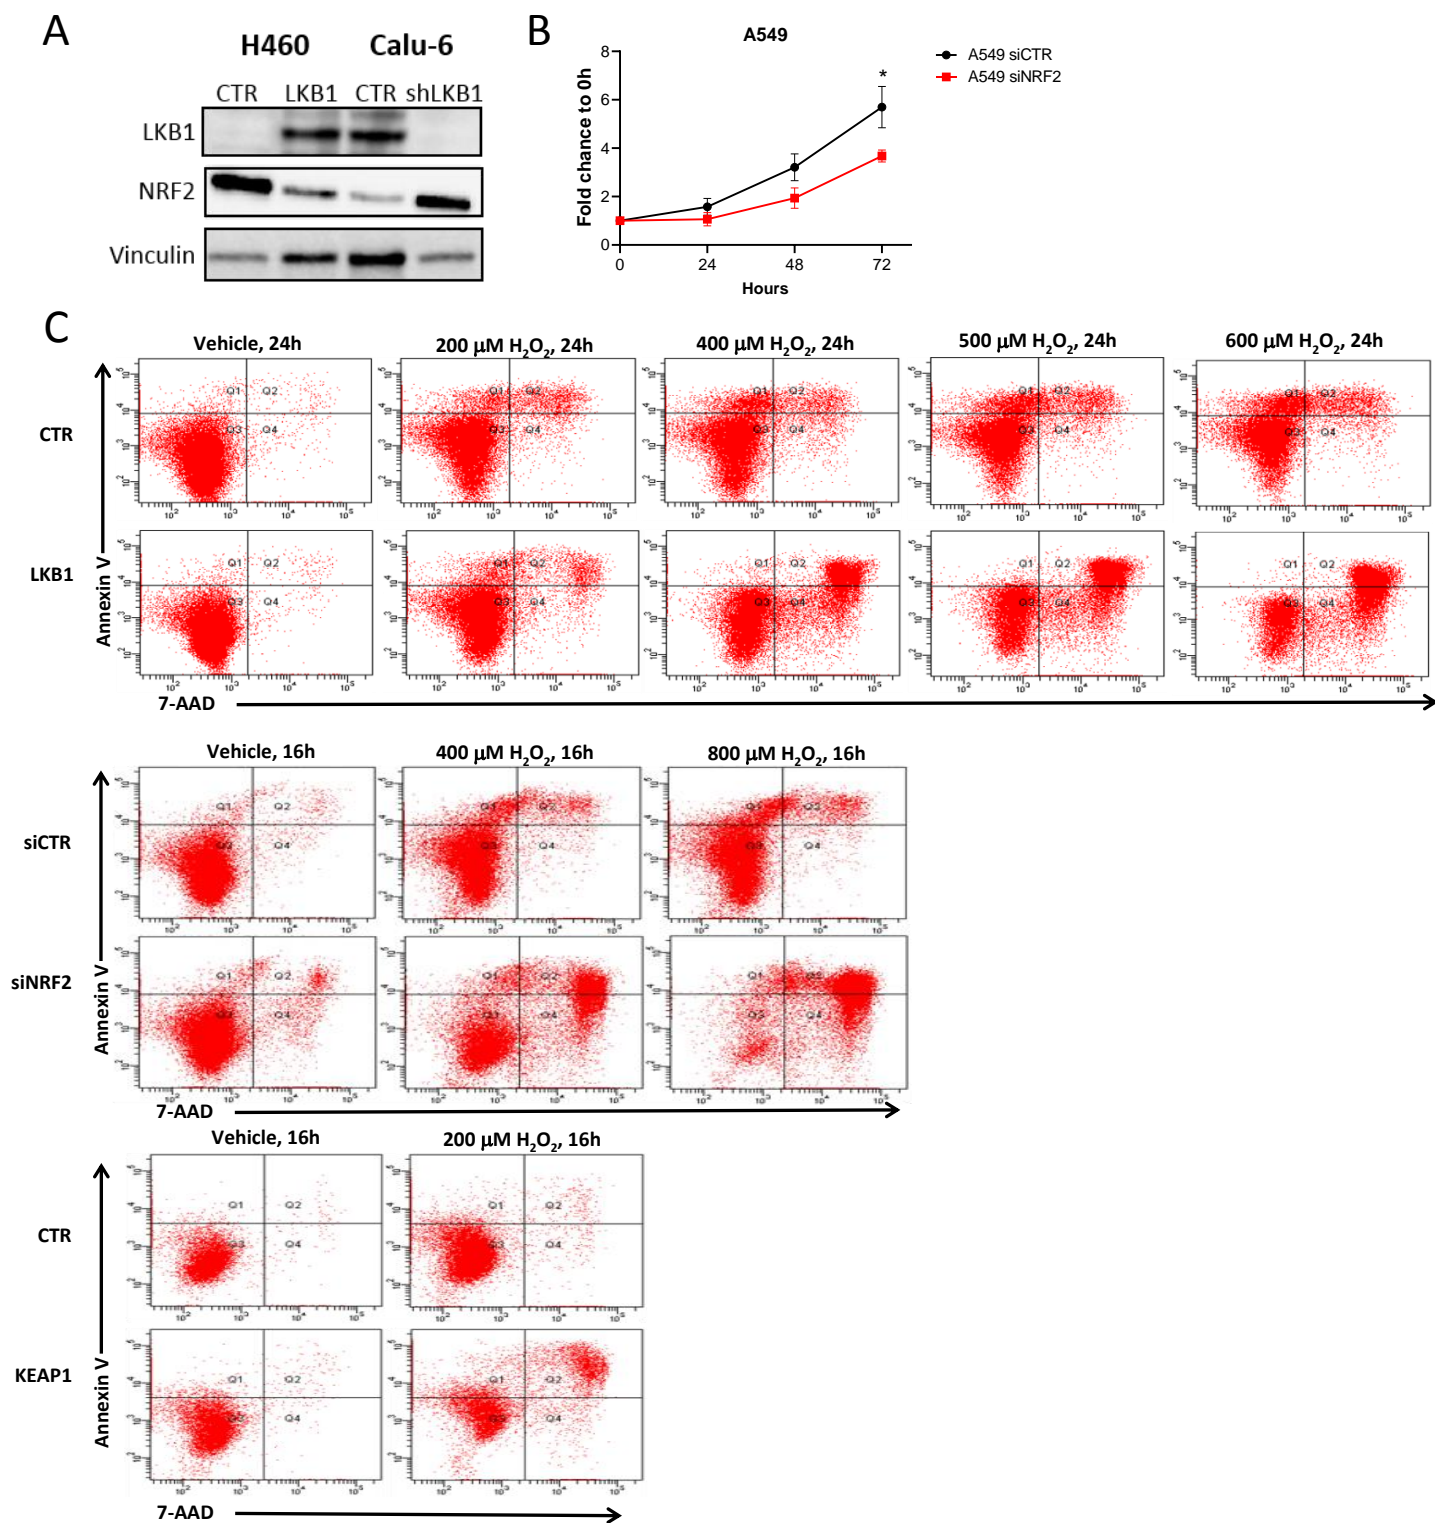

**Figure S3.** (A) Expression of LKB1 and NRF2 after stable expression of LKB1 or silencing by shLKB1 in A549, Calu-6, and H460 cell lines. Vinculin was used as a loading control. (B) Cell proliferation was assessed using cell counting in NRF2-knockdown A549 cells compared with vector control cells (n = 3; mean of three independent experiments are shown in the graph). (C) Apoptosis in A549 cells at 24 hours after treatment with 200 $\mu$ M, 400 $\mu$ M, 500 $\mu$ M, and 600 $\mu$ M H<sub>2</sub>O<sub>2</sub> in LKB1-overexpression clones, at 16 hours after treatment with 400 $\mu$ M and 800 $\mu$ M H<sub>2</sub>O<sub>2</sub> in NRF2-knockdown clones, and at 16 hours after treatment with 200 $\mu$ M H<sub>2</sub>O<sub>2</sub> in KEAP1 clones compared with vector control cells, determined by PE-conjugated Annexin-V/7-AAD staining and flow cytometry. \*P  $\leq$  0.05.

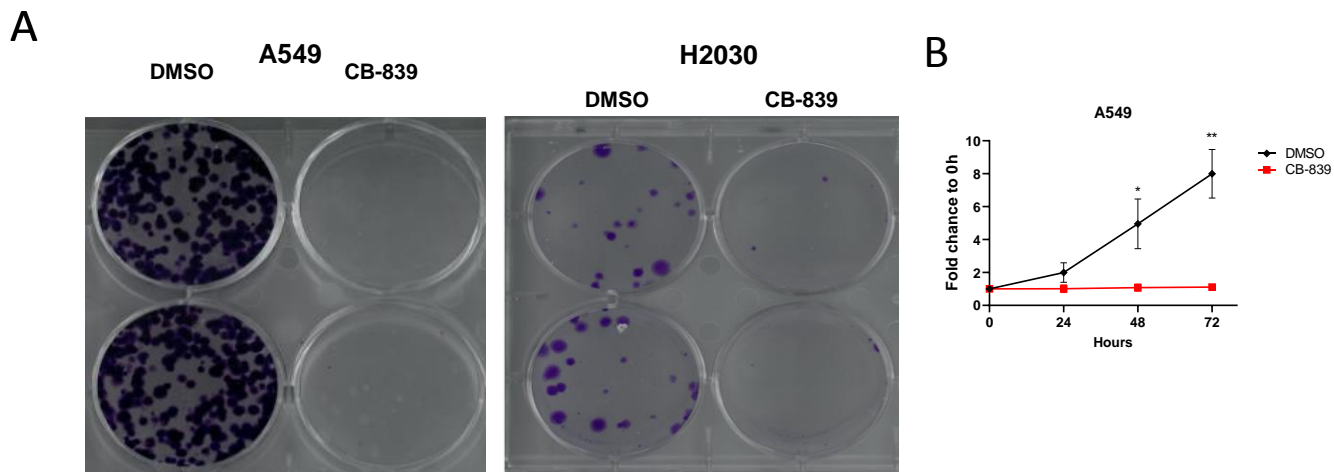

**Figure S4. (A)** Images of the colonies formed from A549 and H2030 cells after treatment with 1 $\mu$ M CB-839. A representative experiment from three or more experiments is shown. **(B)** Cell proliferation, assessed by cell counting, in A549 cells after treatment with 1 $\mu$ M CB-839 (n = 4; mean of 4 independent experiments are shown in the graph). Data are presented as mean  $\pm$  standard error of the mean (error bars). Statistical significance: \*\*P  $\leq$  0.01 and \*P  $\leq$  0.05.

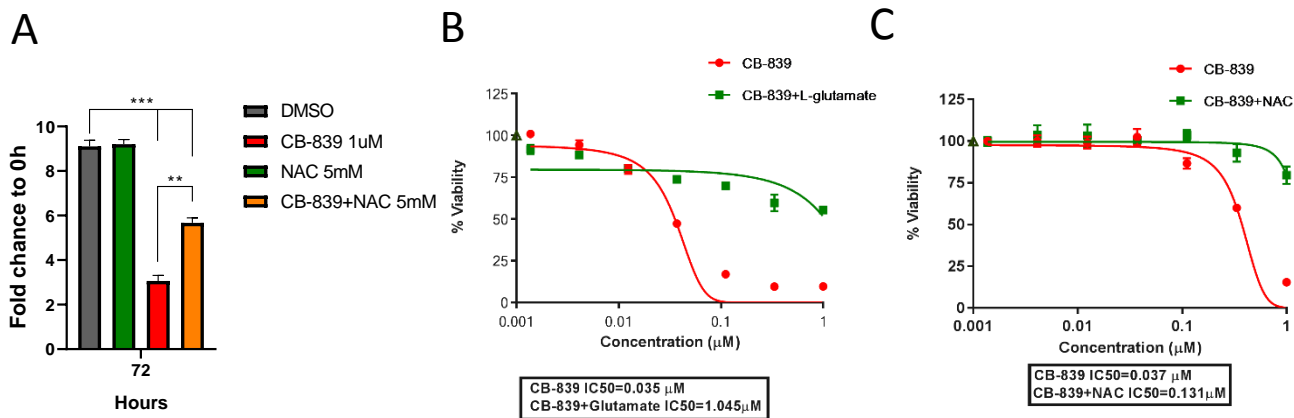

**Figure S5. (A)** Cell proliferation rate by cell counting method after 72 hours of 1 $\mu$ M CB-839 and NAC (n=3; mean of 3 independent experiments are shown in the graph). **(B)** Dose response curve of A549 cells after treatment with 1 $\mu$ M CB-839 and NAC or **(C)** glutamate (A representative experiment is shown). All data are presented as mean  $\pm$  standard error of the mean (error bars). IC<sub>50</sub>, half-maximal inhibitor concentration. \*\*\*P  $\leq$  0.001 and \*\*P  $\leq$  0.01.

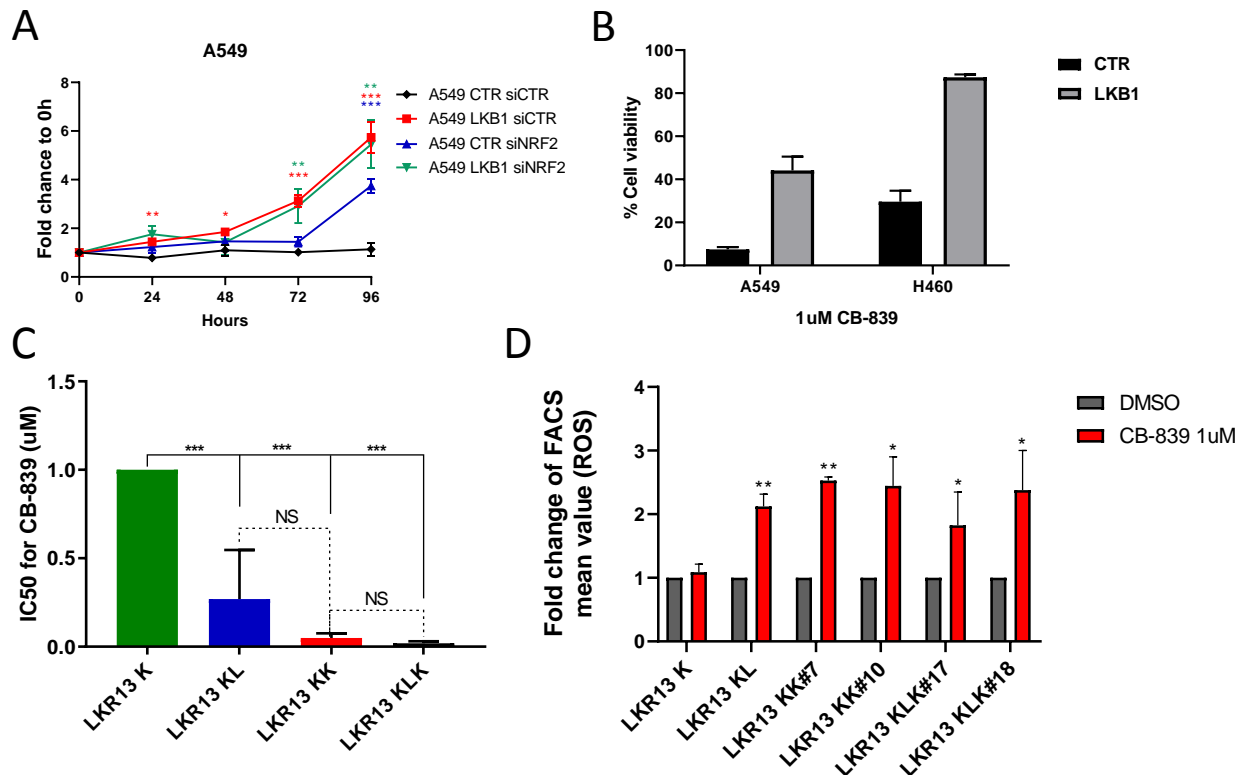

**Figure S6.** LKB1 and KEAP1 loss contribute to high sensitivity to CB-839. **(A)** Cell proliferation assessed by cell counting in isogenic LKB1 pairs of A549 cells with or without NRF2 knockdown after treatment with 1  $\mu$ M CB-839 (n = 4; mean of four independent experiments are shown in the graph). **(B)** Cell viability after 72 hours of treatment with 1  $\mu$ M CB-839 in isogenic LKB1 pairs of A549 and H460 cells (n = 3; mean of three independent experiments are shown in the graph). **(C)** Summary of IC50 concentrations CB-839 in LKR13 isogenic pairs (n = 4; mean of four independent experiments are shown in the graph). **(D)** Intracellular reactive oxygen species (ROS) levels were monitored using CellROX Deep Red and flow cytometry after 48 hours of treatment with 1  $\mu$ M CB-839 (n = 3; mean of three different experiments are shown in the graph). All data are presented as mean  $\pm$  standard error of the mean (error bars). IC50, half-maximal inhibitor concentration. \*\*\*P  $\leq$  0.001, \*\*P  $\leq$  0.01 and \*P  $\leq$  0.05.

**A**

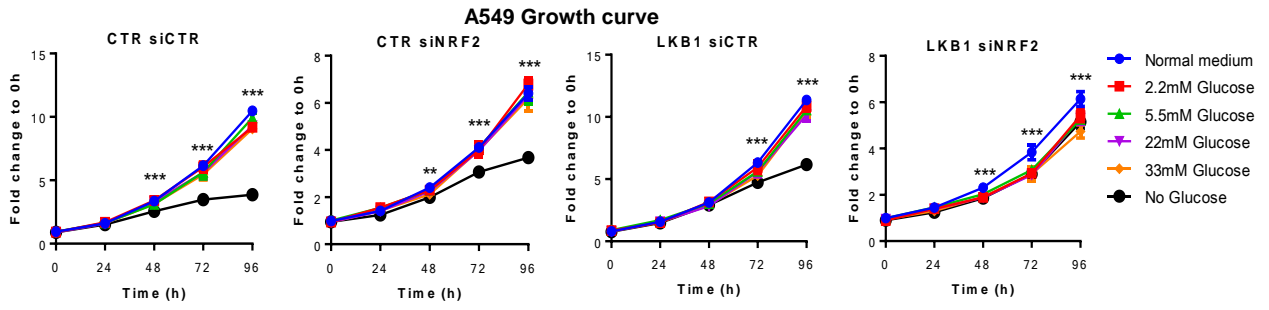

**B**

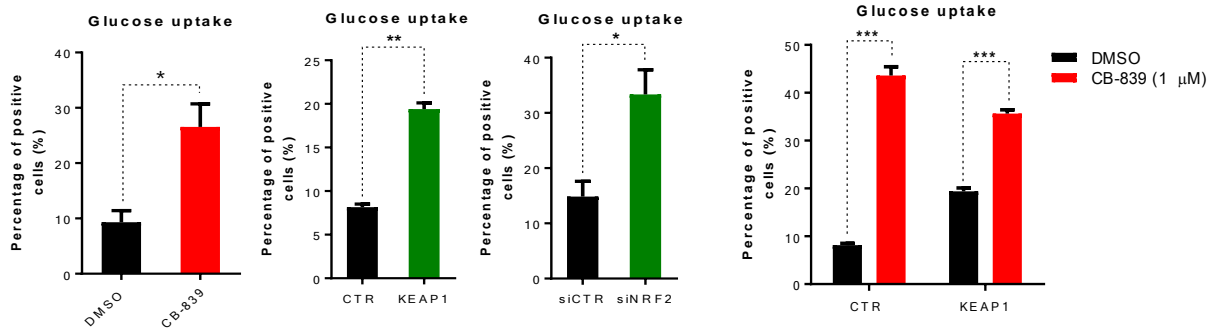

**C**

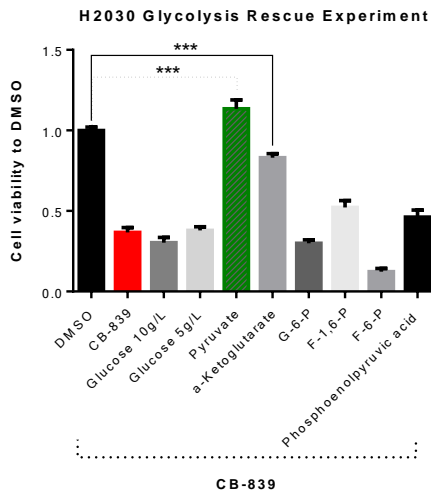

**D**

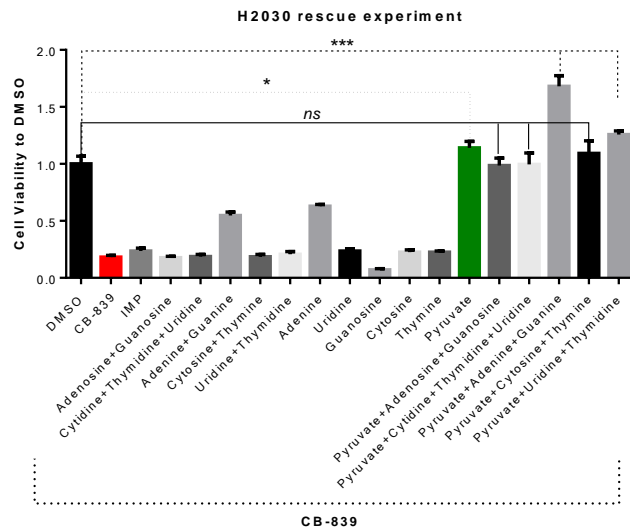

**E**

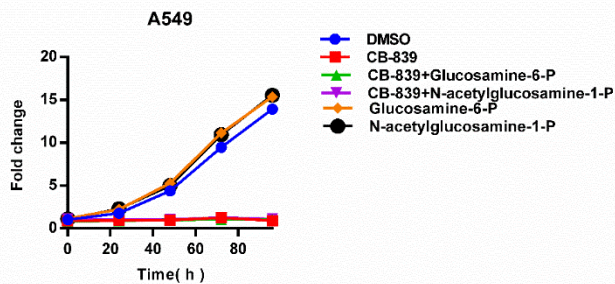

**F**

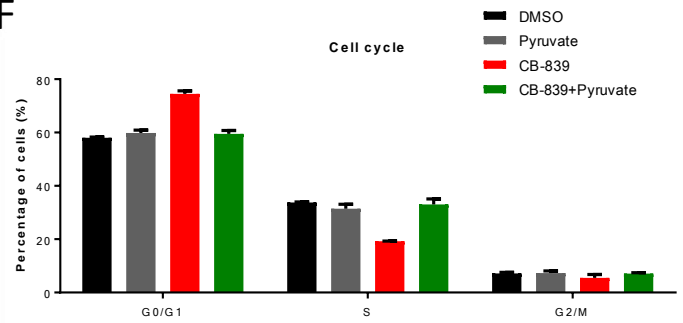

**Figure S7.** (A) Cell proliferation, assessed using the SRB assay, in isogenic LKB1 pairs of A549 cells with or without NRF2 knockdown, performed with different concentrations of glucose. (B) Glucose uptake rate after treatment with 1 $\mu$ M CB-839 in A549 control, KEAP1, or siNRF2 cells. (C) Cell viability of H2030 cells treated with 1 $\mu$ M CB-839 and (D) the indicated concentrations of exogenous nucleotides plus glycolysis and tricarboxylic acid intermediates. (E) Cell proliferation, assessed using the SRB assay, in A549 cells after treatment with 1 $\mu$ M CB-839 and hexosamine intermediates. (F) Cell cycle analysis of A549 cells at 24 hours after treatment with 1mM pyruvate, 1 $\mu$ M CB-839, and 1 $\mu$ M CB-839 plus 1mM pyruvate. All data are presented as mean  $\pm$  standard error of the mean (error bars). A representative experiment is shown. Statistical significance: \*P  $\leq$  0.05; \*\*P  $\leq$  0.01; \*\*\*P  $\leq$  0.001.
